# Supplementary material for: Telomere Signaling and Maintenance Pathways in Spermatozoa of Infertile Men Treated With Antioxidants: An in silico Approach Using Bioinformatic Analysis
Source: PubMed Central journal article supplement (PMC8542908; doi:10.3389/fcell.2021.768510), 2021-10-11
Supplement: Table_1.pdf [file Table_1.pdf]

**Table 1: PICO guidelines to select articles for data mining**

---

|                           |                                                    |
|---------------------------|----------------------------------------------------|
| <i>Population</i>         | Human male patients                                |
| <i>Intervention</i>       | Antioxidants                                       |
| <i>Control/Comparison</i> | Untreated/ negative control or pre-treatment group |
| <i>Outcome (Primary)</i>  | Expression of genes or transcripts or proteins     |

---
