# Supplementary material for: Telomere Signaling and Maintenance Pathways in Spermatozoa of Infertile Men Treated With Antioxidants: An in silico Approach Using Bioinformatic Analysis
Source: PubMed Central journal article supplement (PMC8542908; doi:10.3389/fcell.2021.768510), 2021-10-11
Supplement: Table_2.pdf [file Table_2.pdf]

**Supplementary Table 2:** Differentially expressed proteins in sperm after antioxidant treatment

| <b>SN</b> | <b>Symbol</b> | <b>Protein Name</b>                                             | <b>Expression Fold Change</b> | <b>Location</b>     |
|-----------|---------------|-----------------------------------------------------------------|-------------------------------|---------------------|
| 1         | A1BG          | alpha-1-B glycoprotein                                          | 3.728                         | Extracellular Space |
| 2         | AASS          | aminoadipate-semialdehyde synthase                              | 5.106                         | Cytoplasm           |
| 3         | ABCG2         | ATP binding cassette subfamily G member 2 (Junior blood group)  | $\infty$                      | Plasma Membrane     |
| 4         | ACADS         | acyl-CoA dehydrogenase short chain                              | 1.915                         | Cytoplasm           |
| 5         | ACAT1         | acetyl-CoA acetyltransferase 1                                  | 2.821                         | Cytoplasm           |
| 6         | ACO2          | aconitase 2                                                     | 1.505                         | Cytoplasm           |
| 7         | ACR           | acrosin                                                         | -2.133                        | Extracellular Space |
| 8         | ACTG1         | actin gamma 1                                                   | 2.878                         | Cytoplasm           |
| 9         | ACTR1A        | actin related protein 1A                                        | 3.662                         | Cytoplasm           |
| 10        | ACTRT3        | actin related protein T3                                        | -2.976                        | Nucleus             |
| 11        | AGR2          | anterior gradient 2, protein disulphide isomerase family member | 2.936                         | Extracellular Space |
| 12        | AK1           | adenylate kinase 1                                              | 4.189                         | Cytoplasm           |
| 13        | ALDH1A1       | aldehyde dehydrogenase 1 family member A1                       | 10.322                        | Cytoplasm           |
| 14        | ALDH1A2       | aldehyde dehydrogenase 1 family member A2                       | $\infty$                      | Cytoplasm           |
| 15        | ANKRD28       | ankyrin repeat domain 28                                        | $\infty$                      | Cytoplasm           |
| 16        | ANXA3         | annexin A3                                                      | -3.187                        | Cytoplasm           |
| 17        | AP1B1         | adaptor related protein complex 1 subunit beta 1                | 3.055                         | Cytoplasm           |
| 18        | APMAP         | adipocyte plasma membrane associated protein                    | -1.688                        | Plasma Membrane     |
| 19        | APOA1         | apolipoprotein A1                                               | 4.877                         | Extracellular Space |
| 20        | ARG1          | arginase 1                                                      | -4.465                        | Cytoplasm           |
| 21        | ARMC3         | armadillo repeat containing 3                                   | 5.324                         | Cytoplasm           |

---

|    |          |                                                                     |          |                     |
|----|----------|---------------------------------------------------------------------|----------|---------------------|
| 22 | ARPC2    | actin related protein 2/3 complex subunit 2                         | 20.535   | Cytoplasm           |
| 23 | ARPC4    | actin related protein 2/3 complex subunit 4                         | $\infty$ | Cytoplasm           |
| 24 | ATP1A1   | ATPase Na <sup>+</sup> /K <sup>+</sup> transporting subunit alpha 1 | 2.153    | Plasma Membrane     |
| 25 | ATP1B1   | ATPase Na <sup>+</sup> /K <sup>+</sup> transporting subunit beta 1  | -3.798   | Plasma Membrane     |
| 26 | ATP2B4   | ATPase plasma membrane Ca <sup>2+</sup> transporting 4              | 1.73     | Plasma Membrane     |
| 27 | ATP5F1A  | ATP synthase F1 subunit alpha                                       | 1.809    | Cytoplasm           |
| 28 | ATP5F1B  | ATP synthase F1 subunit beta                                        | 2.76     | Cytoplasm           |
| 29 | ATP5F1C  | ATP synthase F1 subunit gamma                                       | 2.116    | Cytoplasm           |
| 30 | ATP5F1D  | ATP synthase F1 subunit delta                                       | 8.047    | Cytoplasm           |
| 31 | ATP5MG   | ATP synthase membrane subunit g                                     | 2.571    | Cytoplasm           |
| 32 | ATP5PD   | ATP synthase peripheral stalk subunit d                             | 2.82     | Cytoplasm           |
| 33 | ATP5PO   | ATP synthase peripheral stalk subunit OSCP                          | 2.194    | Cytoplasm           |
| 34 | ATP6V1A  | ATPase H <sup>+</sup> transporting V1 subunit A                     | 3.29     | Plasma Membrane     |
| 35 | ATP6V1B2 | ATPase H <sup>+</sup> transporting V1 subunit B2                    | 2.899    | Cytoplasm           |
| 36 | ATP6V1E2 | ATPase H <sup>+</sup> transporting V1 subunit E2                    | $\infty$ | Cytoplasm           |
| 37 | ATP6V1G1 | ATPase H <sup>+</sup> transporting V1 subunit G1                    | 3.626    | Cytoplasm           |
| 38 | AZGP1    | alpha-2-glycoprotein 1, zinc-binding                                | 2.079    | Extracellular Space |
| 39 | BCAP31   | B cell receptor associated protein 31                               | 2.794    | Cytoplasm           |
| 40 | BPHL     | biphenyl hydrolase like                                             | 13.56    | Cytoplasm           |
| 41 | C19orf18 | chromosome 19 open reading frame 18                                 | 6.777    | Cytoplasm           |
| 42 | C2orf88  | chromosome 2 open reading frame 88                                  | 22.315   | Other               |
| 43 | CAB39    | calcium binding protein 39                                          | 4.502    | Cytoplasm           |
| 44 | CABYR    | calcium binding tyrosine phosphorylation regulated                  | -1.913   | Cytoplasm           |

---

---

|    |          |                                                         |          |                     |
|----|----------|---------------------------------------------------------|----------|---------------------|
| 45 | CALR     | calreticulin                                            | 1.725    | Cytoplasm           |
| 46 | CAMP     | cathelicidin antimicrobial peptide                      | 2.095    | Cytoplasm           |
| 47 | CAND1    | cullin associated and neddylation dissociated 1         | 2.471    | Cytoplasm           |
| 48 | CAPZB    | capping actin protein of muscle Z-line subunit beta     | -2.801   | Cytoplasm           |
| 49 | CARM1    | coactivator associated arginine methyltransferase 1     | 2.548    | Nucleus             |
| 50 | CARS1    | cysteinyl-tRNA synthetase 1                             | 6.224    | Cytoplasm           |
| 51 | CATSPERG | cation channel sperm associated auxiliary subunit gamma | -6.687   | Extracellular Space |
| 52 | CCDC126  | coiled-coil domain containing 126                       | 3.719    | Other               |
| 53 | CCDC183  | coiled-coil domain containing 183                       | $\infty$ | Other               |
| 54 | CCDC90B  | coiled-coil domain containing 90B                       | 3.876    | Cytoplasm           |
| 55 | CCT2     | chaperonin containing TCP1 subunit 2                    | 2.235    | Cytoplasm           |
| 56 | CCT3     | chaperonin containing TCP1 subunit 3                    | 1.927    | Cytoplasm           |
| 57 | CCT4     | chaperonin containing TCP1 subunit 4                    | 2.377    | Cytoplasm           |
| 58 | CCT5     | chaperonin containing TCP1 subunit 5                    | 2.485    | Cytoplasm           |
| 59 | CCT7     | chaperonin containing TCP1 subunit 7                    | 1.938    | Cytoplasm           |
| 60 | CCT8     | chaperonin containing TCP1 subunit 8                    | 2.277    | Cytoplasm           |
| 61 | CCT6A    | chaperonin containing TCP1 subunit 6A                   | 2.92     | Cytoplasm           |
| 62 | CCT6B    | chaperonin containing TCP1 subunit 6B                   | 2.637    | Cytoplasm           |
| 63 | CD46     | CD46 molecule                                           | -2.982   | Plasma Membrane     |
| 64 | CD55     | CD55 molecule (Cromer blood group)                      | -2.011   | Plasma Membrane     |
| 65 | CD177    | CD177 molecule                                          | -2.982   | Cytoplasm           |
| 66 | CDSN     | corneodesmosin                                          | -5.097   | Plasma Membrane     |
| 67 | CFAP20   | cilia and flagella associated protein 20                | -3.378   | Cytoplasm           |
| 68 | CFAP43   | cilia and flagella associated protein 43                | -2.14    | Cytoplasm           |
| 69 | CFAP52   | cilia and flagella associated protein 52                | -2.279   | Cytoplasm           |

---

---

|    |         |                                                       |           |                 |
|----|---------|-------------------------------------------------------|-----------|-----------------|
| 70 | CLMN    | calmin                                                | 3.582     | Cytoplasm       |
| 71 | CLPSL1  | colipase like 1                                       | $-\infty$ | Other           |
| 72 | CLU     | clusterin                                             | 2.358     | Cytoplasm       |
| 73 | CNP     | 2',3'-cyclic nucleotide 3' phosphodiesterase          | -2.626    | Cytoplasm       |
| 74 | CNPY2   | canopy FGF signaling regulator 2                      | 2.708     | Plasma Membrane |
| 75 | CPE     | carboxypeptidase E                                    | 2.685     | Cytoplasm       |
| 76 | CPVL    | carboxypeptidase vitellogenic like                    | 3.696     | Cytoplasm       |
| 77 | CSNK2A1 | casein kinase 2 alpha 1                               | -2.414    | Nucleus         |
| 78 | CSNK2B  | casein kinase 2 beta                                  | -3.572    | Cytoplasm       |
| 79 | CYC1    | cytochrome c1                                         | -1.712    | Cytoplasm       |
| 80 | CYCS    | cytochrome c, somatic                                 | 2.886     | Cytoplasm       |
| 81 | DARS2   | aspartyl-tRNA synthetase 2, mitochondrial             | 13.44     | Cytoplasm       |
| 82 | DCTN1   | dynactin subunit 1                                    | 3.075     | Cytoplasm       |
| 83 | DCTN2   | dynactin subunit 2                                    | 6.767     | Cytoplasm       |
| 84 | DCTN3   | dynactin subunit 3                                    | 3.2       | Nucleus         |
| 85 | DCUN1D1 | defective in cullin neddylation 1 domain containing 1 | 4.16      | Nucleus         |
| 86 | DDT     | D-dopachrome tautomerase                              | 3.593     | Cytoplasm       |
| 87 | DECR1   | 2,4-dienoyl-CoA reductase 1                           | 1.594     | Cytoplasm       |
| 88 | DHRS7B  | dehydrogenase/reductase 7B                            | 3.377     | Other           |
| 89 | DLAT    | dihydrolipoamide S-acetyltransferase                  | -2.606    | Cytoplasm       |
| 90 | DLST    | dihydrolipoamide S-succinyltransferase                | -3.053    | Cytoplasm       |
| 91 | DNAJB6  | DnaJ heat shock protein family (Hsp40) member B6      | -3.963    | Nucleus         |
| 92 | DNAJC3  | DnaJ heat shock protein family (Hsp40) member C3      | 4.5       | Cytoplasm       |
| 93 | DNALI1  | dynein axonemal light intermediate chain 1            | 2.068     | Cytoplasm       |

---

---

|     |         |                                                       |          |                 |
|-----|---------|-------------------------------------------------------|----------|-----------------|
| 94  | DPCD    | deleted in primary ciliary dyskinesia homolog (mouse) | 2.717    | Nucleus         |
| 95  | DSC3    | desmocollin 3                                         | -3.988   | Plasma Membrane |
| 96  | DSG1    | desmoglein 1                                          | -2.757   | Plasma Membrane |
| 97  | DSP     | desmoplakin                                           | -2.296   | Plasma Membrane |
| 98  | DUT     | deoxyuridine triphosphatase                           | 1.998    | Nucleus         |
| 99  | DYNLRB2 | dynein light chain roadblock-type 2                   | 2.529    | Cytoplasm       |
| 100 | ECI1    | enoyl-CoA delta isomerase 1                           | 1.997    | Cytoplasm       |
| 101 | EEF2    | eukaryotic translation elongation factor 2            | -2.096   | Cytoplasm       |
| 102 | EEF1E1  | eukaryotic translation elongation factor 1 epsilon 1  | 7.388    | Cytoplasm       |
| 103 | EEF1G   | eukaryotic translation elongation factor 1 gamma      | -1.688   | Cytoplasm       |
| 104 | EFCAB1  | EF-hand calcium binding domain 1                      | 44.361   | Cytoplasm       |
| 105 | EFCAB6  | EF-hand calcium binding domain 6                      | -3.121   | Nucleus         |
| 106 | EFHC1   | EF-hand domain containing 1                           | -11.464  | Cytoplasm       |
| 107 | EFHC2   | EF-hand domain containing 2                           | -12.608  | Cytoplasm       |
| 108 | EIF3A   | eukaryotic translation initiation factor 3 subunit A  | $\infty$ | Cytoplasm       |
| 109 | EIF3F   | eukaryotic translation initiation factor 3 subunit F  | 2.212    | Cytoplasm       |
| 110 | EIF3M   | eukaryotic translation initiation factor 3 subunit M  | 4.086    | Cytoplasm       |
| 111 | ELSPBP1 | epididymal sperm binding protein 1                    | -1.996   | Other           |
| 112 | ERP29   | endoplasmic reticulum protein 29                      | 3.11     | Cytoplasm       |
| 113 | ETFA    | electron transfer flavoprotein subunit alpha          | 1.792    | Cytoplasm       |
| 114 | ETFB    | electron transfer flavoprotein subunit beta           | 4.944    | Cytoplasm       |
| 115 | ETFDH   | electron transfer flavoprotein dehydrogenase          | 5.059    | Cytoplasm       |

---

---

|     |                   |                                                              |         |                     |
|-----|-------------------|--------------------------------------------------------------|---------|---------------------|
| 116 | ETFRF1            | electron transfer flavoprotein regulatory factor 1           | 5.106   | Cytoplasm           |
| 117 | EZR               | ezrin                                                        | 2.917   | Plasma Membrane     |
| 118 | FAAH              | fatty acid amide hydrolase                                   | -1.847  | Plasma Membrane     |
| 119 | FAM71B            | family with sequence similarity 71 member B                  | -3.614  | Nucleus             |
| 120 | FARSB             | phenylalanyl-tRNA synthetase subunit beta                    | 5.962   | Cytoplasm           |
| 121 | FDXR              | ferredoxin reductase                                         | 9.564   | Cytoplasm           |
| 122 | FGL1              | fibrinogen like 1                                            | -2.664  | Extracellular Space |
| 123 | FH                | fumarate hydratase                                           | 2.101   | Cytoplasm           |
| 124 | FKBP2             | FKBP prolyl isomerase 2                                      | 2.829   | Cytoplasm           |
| 125 | FLAD1             | flavin adenine dinucleotide synthetase 1                     | 13.128  | Cytoplasm           |
| 126 | FLNB              | filamin B                                                    | -2.114  | Cytoplasm           |
| 127 | FMR1NB            | FMR1 neighbor                                                | -2.04   | Nucleus             |
| 128 | FUCA1             | alpha-L-fucosidase 1                                         | 2.332   | Cytoplasm           |
| 129 | GANAB             | glucosidase II alpha subunit                                 | 4.461   | Cytoplasm           |
| 130 | GAPDHS            | glyceraldehyde-3-phosphate dehydrogenase, spermatogenic      | -13.426 | Cytoplasm           |
| 131 | GATD3A/G<br>ATD3B | glutamine amidotransferase like class 1 domain containing 3A | 4.935   | Cytoplasm           |
| 132 | GDE1              | glycerophosphodiester phosphodiesterase 1                    | -6.355  | Plasma Membrane     |
| 133 | GDPD1             | glycerophosphodiester phosphodiesterase domain containing 1  | -2.457  | Cytoplasm           |
| 134 | GFPT1             | glutamine--fructose-6-phosphate transaminase 1               | -2.779  | Cytoplasm           |
| 135 | GK2               | glycerol kinase 2                                            | -2.619  | Cytoplasm           |
| 136 | GK3P              | glycerol kinase 3 pseudogene                                 | -2.95   | Other               |
| 137 | GLB1L             | galactosidase beta 1 like                                    | -2.14   | Extracellular Space |
| 138 | GLIPR1L2          | GLIPR1 like 2                                                | -2.697  | Extracellular Space |

---

|     |                               |                                                             |         |                     |
|-----|-------------------------------|-------------------------------------------------------------|---------|---------------------|
| 139 | GLRX5                         | glutaredoxin 5                                              | 4.112   | Cytoplasm           |
| 140 | GLUL                          | glutamate-ammonia ligase                                    | -10.422 | Cytoplasm           |
| 141 | GOLT1B                        | golgi transport 1B                                          | 2.182   | Cytoplasm           |
| 142 | GPD2                          | glycerol-3-phosphate dehydrogenase 2                        | -2.271  | Cytoplasm           |
| 143 | GPI                           | glucose-6-phosphate isomerase                               | 1.552   | Extracellular Space |
| 144 | GPX4                          | glutathione peroxidase 4                                    | -2.646  | Cytoplasm           |
| 145 | GRPEL1                        | GrpE like 1, mitochondrial                                  | 4.691   | Cytoplasm           |
| 146 | GSDMA                         | gasdermin A                                                 | -11.342 | Cytoplasm           |
| 147 | GSTO2                         | glutathione S-transferase omega 2                           | -6.04   | Cytoplasm           |
| 148 | GSTZ1                         | glutathione S-transferase zeta 1                            | 2.78    | Cytoplasm           |
| 149 | H2AB3<br>(includes<br>others) | H2A.B variant histone 3                                     | 6.771   | Nucleus             |
| 150 | H2AZ2                         | H2A.Z variant histone 2                                     | 4.19    | Nucleus             |
| 151 | H2BC1                         | H2B clustered histone 1                                     | 2.119   | Nucleus             |
| 152 | HADH                          | hydroxyacyl-CoA dehydrogenase                               | 1.495   | Cytoplasm           |
| 153 | HDDC2                         | HD domain containing 2                                      | 38.431  | Cytoplasm           |
| 154 | HDHD5                         | haloacid dehalogenase like hydrolase<br>domain containing 5 | 4.322   | Cytoplasm           |
| 155 | HIGD1A                        | HIG1 hypoxia inducible domain family<br>member 1A           | 2.42    | Cytoplasm           |
| 156 | HIGD2A                        | HIG1 hypoxia inducible domain family<br>member 2A           | 3.537   | Cytoplasm           |
| 157 | HINT2                         | histidine triad nucleotide binding protein<br>2             | 2.067   | Cytoplasm           |
| 158 | HK1                           | hexokinase 1                                                | 2.682   | Cytoplasm           |
| 159 | HMOX2                         | heme oxygenase 2                                            | 2.282   | Cytoplasm           |
| 160 | HPRT1                         | hypoxanthine phosphoribosyltransferase<br>1                 | 2.154   | Cytoplasm           |
| 161 | HSCB                          | HscB mitochondrial iron-sulfur cluster<br>cochaperone       | 12.912  | Cytoplasm           |

---

|     |          |                                                                |           |                 |
|-----|----------|----------------------------------------------------------------|-----------|-----------------|
| 162 | HSD17B10 | hydroxysteroid 17-beta dehydrogenase 10                        | 1.704     | Cytoplasm       |
| 163 | HSP90B1  | heat shock protein 90 beta family member 1                     | 2.277     | Cytoplasm       |
| 164 | HSPA4    | heat shock protein family A (Hsp70) member 4                   | 4.081     | Cytoplasm       |
| 165 | HSPA13   | heat shock protein family A (Hsp70) member 13                  | 10.644    | Cytoplasm       |
| 166 | HSPA4L   | heat shock protein family A (Hsp70) member 4 like              | 3.8       | Cytoplasm       |
| 167 | HSPD1    | heat shock protein family D (Hsp60) member 1                   | 3.258     | Cytoplasm       |
| 168 | HSPE1    | heat shock protein family E (Hsp10) member 1                   | 2.031     | Cytoplasm       |
| 169 | HSPH1    | heat shock protein family H (Hsp110) member 1                  | 3.432     | Cytoplasm       |
| 170 | HYOU1    | hypoxia up-regulated 1                                         | 2.924     | Cytoplasm       |
| 171 | IDH1     | isocitrate dehydrogenase (NADP(+)) 1                           | 4.772     | Cytoplasm       |
| 172 | IDH2     | isocitrate dehydrogenase (NADP(+)) 2                           | 2.779     | Cytoplasm       |
| 173 | IDH3B    | isocitrate dehydrogenase (NAD(+)) 3 non-catalytic subunit beta | 3.207     | Cytoplasm       |
| 174 | IL4I1    | interleukin 4 induced 1                                        | 1.832     | Cytoplasm       |
| 175 | IMMP2L   | inner mitochondrial membrane peptidase subunit 2               | 3.027     | Cytoplasm       |
| 176 | IQCN     | IQ motif containing N                                          | -2.213    | Cytoplasm       |
| 177 | IQGAP2   | IQ motif containing GTPase activating protein 2                | $-\infty$ | Cytoplasm       |
| 178 | ISOC2    | isochorismatase domain containing 2                            | 1.583     | Cytoplasm       |
| 179 | JUP      | junction plakoglobin                                           | -2.206    | Plasma Membrane |
| 180 | KLHL10   | kelch like family member 10                                    | -2.292    | Nucleus         |
| 181 | KPNB1    | karyopherin subunit beta 1                                     | 1.577     | Nucleus         |
| 182 | KPRP     | keratinocyte proline rich protein                              | -2.347    | Cytoplasm       |

---



|     |        |                                                     |          |                     |
|-----|--------|-----------------------------------------------------|----------|---------------------|
| 183 | KRT1   | keratin 1                                           | -2.526   | Cytoplasm           |
| 184 | KRT2   | keratin 2                                           | -2.668   | Cytoplasm           |
| 185 | KRT9   | keratin 9                                           | -2.438   | Cytoplasm           |
| 186 | KRT18  | keratin 18                                          | $\infty$ | Cytoplasm           |
| 187 | KTN1   | kinectin 1                                          | 2.352    | Plasma Membrane     |
| 188 | L2HGDH | L-2-hydroxyglutarate dehydrogenase                  | $\infty$ | Cytoplasm           |
| 189 | LDHB   | lactate dehydrogenase B                             | 6.549    | Cytoplasm           |
| 190 | LDHC   | lactate dehydrogenase C                             | 3.119    | Cytoplasm           |
| 191 | LGMN   | legumain                                            | 6.428    | Cytoplasm           |
| 192 | LONP1  | lon peptidase 1, mitochondrial                      | 3.597    | Cytoplasm           |
| 193 | LYRM7  | LYR motif containing 7                              | 18.675   | Cytoplasm           |
| 194 | MANF   | mesencephalic astrocyte derived neurotrophic factor | 2.802    | Extracellular Space |
| 195 | MCCC2  | methylcrotonoyl-CoA carboxylase 2                   | 8.353    | Cytoplasm           |
| 196 | ME1    | malic enzyme 1                                      | 2.867    | Cytoplasm           |
| 197 | ME2    | malic enzyme 2                                      | -1.671   | Cytoplasm           |
| 198 | MIF    | macrophage migration inhibitory factor              | $\infty$ | Extracellular Space |
| 199 | MLF1   | myeloid leukemia factor 1                           | -5.604   | Nucleus             |
| 200 | MMAA   | metabolism of cobalamin associated A                | $\infty$ | Cytoplasm           |
| 201 | MMAB   | metabolism of cobalamin associated B                | 6.188    | Cytoplasm           |
| 202 | MME    | membrane metalloendopeptidase                       | -1.734   | Plasma Membrane     |
| 203 | MPST   | mercaptopyruvate sulfurtransferase                  | 8.299    | Cytoplasm           |
| 204 | MPV17  | mitochondrial inner membrane protein MPV17          | -5.872   | Cytoplasm           |
| 205 | MT-CO1 | cytochrome c oxidase subunit I                      | -2.977   | Cytoplasm           |
| 206 | MTX1   | metaxin 1                                           | 2.523    | Cytoplasm           |
| 207 | MXRA5  | matrix remodeling associated 5                      | 7.919    | Extracellular Space |
| 208 | MYDGF  | myeloid derived growth factor                       | 3.314    | Extracellular Space |

---

|     |           |                                                |           |                     |
|-----|-----------|------------------------------------------------|-----------|---------------------|
| 209 | NAPA      | NSF attachment protein alpha                   | 2.609     | Cytoplasm           |
| 210 | NAXD      | NAD(P)HX dehydratase                           | 6.981     | Cytoplasm           |
| 211 | NDUFA6    | NADH:ubiquinone oxidoreductase subunit A6      | 2.703     | Cytoplasm           |
| 212 | NDUFA9    | NADH:ubiquinone oxidoreductase subunit A9      | 2.487     | Cytoplasm           |
| 213 | NDUFA13   | NADH:ubiquinone oxidoreductase subunit A13     | 3.301     | Cytoplasm           |
| 214 | NDUFB5    | NADH:ubiquinone oxidoreductase subunit B5      | 2.988     | Cytoplasm           |
| 215 | NDUFB11   | NADH:ubiquinone oxidoreductase subunit B11     | -5.56     | Cytoplasm           |
| 216 | NDUFS1    | NADH:ubiquinone oxidoreductase core subunit S1 | 1.828     | Cytoplasm           |
| 217 | NDUFS8    | NADH:ubiquinone oxidoreductase core subunit S8 | 3.697     | Cytoplasm           |
| 218 | NIPSNAP3A | nipsnap homolog 3A                             | -1.629    | Nucleus             |
| 219 | NME7      | NME/NM23 family member 7                       | -14.92    | Cytoplasm           |
| 220 | NONO      | non-POU domain containing octamer binding      | $-\infty$ | Nucleus             |
| 221 | NPEPPS    | aminopeptidase puromycin sensitive             | 4.157     | Cytoplasm           |
| 222 | NPTX2     | neuronal pentraxin 2                           | $-\infty$ | Extracellular Space |
| 223 | NT5C      | 5', 3'-nucleotidase, cytosolic                 | 5.802     | Cytoplasm           |
| 224 | NUP35     | nucleoporin 35                                 | 5.442     | Nucleus             |
| 225 | NUP58     | nucleoporin 58                                 | 2.11      | Nucleus             |
| 226 | NUP155    | nucleoporin 155                                | -2.136    | Nucleus             |
| 227 | NUP205    | nucleoporin 205                                | -2.075    | Nucleus             |
| 228 | NUP210    | nucleoporin 210                                | -13.334   | Nucleus             |
| 229 | NUP210L   | nucleoporin 210 like                           | -30.144   | Other               |
| 230 | OXCT1     | 3-oxoacid CoA-transferase 1                    | 3.27      | Cytoplasm           |
| 231 | P4HB      | prolyl 4-hydroxylase subunit beta              | 1.536     | Cytoplasm           |

---

---

|     |        |                                                                          |          |                     |
|-----|--------|--------------------------------------------------------------------------|----------|---------------------|
| 232 | PARK7  | Parkinsonism associated deglycase                                        | 2.694    | Nucleus             |
| 233 | PCK2   | phosphoenolpyruvate carboxykinase 2, mitochondrial                       | $\infty$ | Cytoplasm           |
| 234 | PDHB   | pyruvate dehydrogenase E1 subunit beta                                   | 1.958    | Cytoplasm           |
| 235 | PDIA3  | protein disulfide isomerase family A member 3                            | 2.439    | Cytoplasm           |
| 236 | PDIA4  | protein disulfide isomerase family A member 4                            | 1.813    | Cytoplasm           |
| 237 | PDIA6  | protein disulfide isomerase family A member 6                            | 1.747    | Cytoplasm           |
| 238 | PDILT  | protein disulfide isomerase like, testis expressed                       | 3.687    | Extracellular Space |
| 239 | PEX11B | peroxisomal biogenesis factor 11 beta                                    | 2.751    | Cytoplasm           |
| 240 | PFKP   | phosphofructokinase, platelet                                            | 1.696    | Cytoplasm           |
| 241 | PGAM5  | PGAM family member 5, mitochondrial serine/threonine protein phosphatase | 2.55     | Cytoplasm           |
| 242 | PGP    | phosphoglycolate phosphatase                                             | 4.263    | Cytoplasm           |
| 243 | PGS1   | phosphatidylglycerophosphate synthase 1                                  | $\infty$ | Cytoplasm           |
| 244 | PHB2   | prohibitin 2                                                             | 3.32     | Cytoplasm           |
| 245 | PHB    | prohibitin                                                               | 3.816    | Nucleus             |
| 246 | PIP    | prolactin induced protein                                                | 2.096    | Extracellular Space |
| 247 | PITRM1 | pitrilysin metallopeptidase 1                                            | 1.873    | Cytoplasm           |
| 248 | PKM    | pyruvate kinase M1/2                                                     | -1.835   | Cytoplasm           |
| 249 | PKP1   | plakophilin 1                                                            | -3.445   | Plasma Membrane     |
| 250 | PLIN3  | perilipin 3                                                              | $\infty$ | Cytoplasm           |
| 251 | PMPCA  | peptidase, mitochondrial processing subunit alpha                        | 6.031    | Cytoplasm           |
| 252 | PMPCB  | peptidase, mitochondrial processing subunit beta                         | 2.776    | Cytoplasm           |
| 253 | PPIL6  | peptidylprolyl isomerase like 6                                          | -3.352   | Other               |
| 254 | PPOX   | protoporphyrinogen oxidase                                               | 7.584    | Cytoplasm           |

---

---

|     |         |                                                                |          |           |
|-----|---------|----------------------------------------------------------------|----------|-----------|
| 255 | PPP2R1A | protein phosphatase 2 scaffold subunit Aalpha                  | 3.551    | Cytoplasm |
| 256 | PPP4R1  | protein phosphatase 4 regulatory subunit 1                     | 3.836    | Other     |
| 257 | PRDX5   | peroxiredoxin 5                                                | 2.775    | Cytoplasm |
| 258 | PRKACA  | protein kinase cAMP-activated catalytic subunit alpha          | 2.53     | Cytoplasm |
| 259 | PRKAR1A | protein kinase cAMP-dependent type I regulatory subunit alpha  | 3.676    | Cytoplasm |
| 260 | PRKAR2A | protein kinase cAMP-dependent type II regulatory subunit alpha | 1.674    | Cytoplasm |
| 261 | PRKCSH  | protein kinase C substrate 80K-H                               | 3.012    | Cytoplasm |
| 262 | PRPS2   | phosphoribosyl pyrophosphate synthetase 2                      | $\infty$ | Cytoplasm |
| 263 | PSMB1   | proteasome 20S subunit beta 1                                  | 2.096    | Cytoplasm |
| 264 | PSMB2   | proteasome 20S subunit beta 2                                  | 2.501    | Cytoplasm |
| 265 | PSMB3   | proteasome 20S subunit beta 3                                  | 2.045    | Cytoplasm |
| 266 | PSMD3   | proteasome 26S subunit, non-ATPase 3                           | 2.365    | Cytoplasm |
| 267 | PSMD4   | proteasome 26S subunit, non-ATPase 4                           | 2.929    | Cytoplasm |
| 268 | PSMD6   | proteasome 26S subunit, non-ATPase 6                           | 3.271    | Cytoplasm |
| 269 | PSMD11  | proteasome 26S subunit, non-ATPase 11                          | 2.44     | Cytoplasm |
| 270 | PSMD13  | proteasome 26S subunit, non-ATPase 13                          | 2.066    | Cytoplasm |
| 271 | PSME2   | proteasome activator subunit 2                                 | 11.193   | Cytoplasm |
| 272 | PTPMT1  | protein tyrosine phosphatase mitochondrial 1                   | 3.484    | Cytoplasm |
| 273 | PTRHD1  | peptidyl-tRNA hydrolase domain containing 1                    | 9.523    | Cytoplasm |
| 274 | RAB14   | RAB14, member RAS oncogene family                              | 2.847    | Cytoplasm |
| 275 | RAB11B  | RAB11B, member RAS oncogene family                             | 3.307    | Cytoplasm |
| 276 | RAB5B   | RAB5B, member RAS oncogene family                              | $\infty$ | Cytoplasm |
| 277 | RAB5C   | RAB5C, member RAS oncogene family                              | 3.852    | Cytoplasm |

---

---

|     |        |                                   |          |                 |
|-----|--------|-----------------------------------|----------|-----------------|
| 278 | RAB6A  | RAB6A, member RAS oncogene family | 2.894    | Cytoplasm       |
| 279 | RARS1  | arginyl-tRNA synthetase 1         | 8.676    | Cytoplasm       |
| 280 | REEP6  | receptor accessory protein 6      | 2.306    | Plasma Membrane |
| 281 | RNF121 | ring finger protein 121           | -11.056  | Other           |
| 282 | RPL3   | ribosomal protein L3              | 2.712    | Nucleus         |
| 283 | RPL5   | ribosomal protein L5              | 2.587    | Cytoplasm       |
| 284 | RPL6   | ribosomal protein L6              | 2.01     | Nucleus         |
| 285 | RPL8   | ribosomal protein L8              | $\infty$ | Cytoplasm       |
| 286 | RPL9   | ribosomal protein L9              | 3.55     | Nucleus         |
| 287 | RPL11  | ribosomal protein L11             | 2.657    | Cytoplasm       |
| 288 | RPL12  | ribosomal protein L12             | 2.541    | Nucleus         |
| 289 | RPL13  | ribosomal protein L13             | 14.37    | Nucleus         |
| 290 | RPL14  | ribosomal protein L14             | 4.929    | Cytoplasm       |
| 291 | RPL17  | ribosomal protein L17             | $\infty$ | Cytoplasm       |
| 292 | RPL18  | ribosomal protein L18             | 18.192   | Cytoplasm       |
| 293 | RPL28  | ribosomal protein L28             | 57.861   | Cytoplasm       |
| 294 | RPL31  | ribosomal protein L31             | 9.496    | Cytoplasm       |
| 295 | RPL36  | ribosomal protein L36             | 14.931   | Cytoplasm       |
| 296 | RPL38  | ribosomal protein L38             | $\infty$ | Cytoplasm       |
| 297 | RPL10A | ribosomal protein L10a            | 2.263    | Nucleus         |
| 298 | RPL13A | ribosomal protein L13a            | 4.052    | Cytoplasm       |
| 299 | RPS3   | ribosomal protein S3              | 2.741    | Cytoplasm       |
| 300 | RPS5   | ribosomal protein S5              | 21.492   | Cytoplasm       |
| 301 | RPS7   | ribosomal protein S7              | 5.996    | Cytoplasm       |
| 302 | RPS10  | ribosomal protein S10             | 32.134   | Cytoplasm       |
| 303 | RPS12  | ribosomal protein S12             | 4.191    | Cytoplasm       |
| 304 | RPS13  | ribosomal protein S13             | 3.558    | Cytoplasm       |
| 305 | RPS16  | ribosomal protein S16             | 4.006    | Cytoplasm       |

---

---

|     |           |                                                           |          |                     |
|-----|-----------|-----------------------------------------------------------|----------|---------------------|
| 306 | RPS18     | ribosomal protein S18                                     | 3.729    | Cytoplasm           |
| 307 | RPS19     | ribosomal protein S19                                     | 4.946    | Cytoplasm           |
| 308 | RPS20     | ribosomal protein S20                                     | 23.972   | Cytoplasm           |
| 309 | RPS21     | ribosomal protein S21                                     | $\infty$ | Cytoplasm           |
| 310 | RPSA      | ribosomal protein SA                                      | 3.586    | Cytoplasm           |
| 311 | RSPH1     | radial spoke head component 1                             | -3.344   | Nucleus             |
| 312 | RSPH9     | radial spoke head component 9                             | -1.939   | Cytoplasm           |
| 313 | RSPH6A    | radial spoke head 6 homolog A                             | -3.607   | Extracellular Space |
| 314 | RUVBL2    | RuvB like AAA ATPase 2                                    | 1.733    | Nucleus             |
| 315 | SACM1L    | SAC1 like phosphatidylinositide phosphatase               | 2.527    | Cytoplasm           |
| 316 | SAMM50    | SAMM50 sorting and assembly machinery component           | -4.617   | Cytoplasm           |
| 317 | SARAF     | store-operated calcium entry associated regulatory factor | -35.42   | Cytoplasm           |
| 318 | SCCPDH    | saccharopine dehydrogenase (putative)                     | -1.63    | Cytoplasm           |
| 319 | SDR39U1   | short chain dehydrogenase/reductase family 39U member 1   | 5.24     | Nucleus             |
| 320 | SEC61B    | SEC61 translocon subunit beta                             | 3.811    | Cytoplasm           |
| 321 | SELENOI   | selenoprotein I                                           | -3.264   | Cytoplasm           |
| 322 | SEMG1     | semenogelin 1                                             | 2.074    | Extracellular Space |
| 323 | SEMG2     | semenogelin 2                                             | 2.977    | Extracellular Space |
| 324 | SERPINB12 | serpin family B member 12                                 | -4.276   | Cytoplasm           |
| 325 | SH3GLB1   | SH3 domain containing GRB2 like, endophilin B1            | 2.81     | Cytoplasm           |
| 326 | SLC25A10  | solute carrier family 25 member 10                        | 2.079    | Cytoplasm           |
| 327 | SLC25A42  | solute carrier family 25 member 42                        | 3.025    | Cytoplasm           |
| 328 | SLC26A3   | solute carrier family 26 member 3                         | 22.144   | Plasma Membrane     |
| 329 | SLC2A14   | solute carrier family 2 member 14                         | 2.021    | Nucleus             |
| 330 | SLC44A5   | solute carrier family 44 member 5                         | -2.291   | Plasma Membrane     |

---

|     |                    |                                                 |        |                 |
|-----|--------------------|-------------------------------------------------|--------|-----------------|
| 331 | SMPD4              | sphingomyelin phosphodiesterase 4               | -2.576 | Cytoplasm       |
| 332 | SPA17              | sperm autoantigenic protein 17                  | 8.814  | Plasma Membrane |
| 333 | SPACA1             | sperm acrosome associated 1                     | -2.325 | Cytoplasm       |
| 334 | SPACA9             | sperm acrosome associated 9                     | 2.646  | Cytoplasm       |
| 335 | SPACA5/<br>SPACA5B | sperm acrosome associated 5B                    | 2.732  | Other           |
| 336 | SPCS1              | signal peptidase complex subunit 1              | -3.434 | Cytoplasm       |
| 337 | SPESP1             | sperm equatorial segment protein 1              | 3.885  | Cytoplasm       |
| 338 | SSNA1              | SS nuclear autoantigen 1                        | 11.295 | Cytoplasm       |
| 339 | ST13               | ST13 Hsp70 interacting protein                  | 4.128  | Cytoplasm       |
| 340 | STIP1              | stress induced phosphoprotein 1                 | 2.613  | Cytoplasm       |
| 341 | STX12              | syntaxin 12                                     | 2.845  | Cytoplasm       |
| 342 | STYXL1             | serine/threonine/tyrosine interacting like 1    | -4.12  | Cytoplasm       |
| 343 | SYT7               | synaptotagmin 7                                 | -2.75  | Cytoplasm       |
| 344 | TCP1               | t-complex 1                                     | 2.305  | Cytoplasm       |
| 345 | TEX44              | testis expressed 44                             | 3.019  | Cytoplasm       |
| 346 | THNSL1             | threonine synthase like 1                       | ∞      | Nucleus         |
| 347 | THSD4              | thrombospondin type 1 domain containing 4       | -3.715 | Cytoplasm       |
| 348 | TIMM17B            | translocase of inner mitochondrial membrane 17B | ∞      | Cytoplasm       |
| 349 | TKFC               | triokinase and FMN cyclase                      | 3.315  | Cytoplasm       |
| 350 | TKTL1              | transketolase like 1                            | 3.39   | Cytoplasm       |
| 351 | TM9SF3             | transmembrane 9 superfamily member 3            | -1.992 | Cytoplasm       |
| 352 | TMCO2              | transmembrane and coiled-coil domains 2         | 2.152  | Nucleus         |
| 353 | TMEM89             | transmembrane protein 89                        | -3.068 | Nucleus         |
| 354 | TMEM160            | transmembrane protein 160                       | -7.409 | Cytoplasm       |
| 355 | TMEM205            | transmembrane protein 205                       | -2.144 | Cytoplasm       |

|     |          |                                                          |         |                     |
|-----|----------|----------------------------------------------------------|---------|---------------------|
| 356 | TMEM126A | transmembrane protein 126A                               | 2.115   | Cytoplasm           |
| 357 | TMEM38B  | transmembrane protein 38B                                | -5.322  | Nucleus             |
| 358 | TOMM20   | translocase of outer mitochondrial membrane 20           | 4.248   | Cytoplasm           |
| 359 | TOMM34   | translocase of outer mitochondrial membrane 34           | ∞       | Cytoplasm           |
| 360 | TOR2A    | torsin family 2 member A                                 | 4.94    | Extracellular Space |
| 361 | TPI1     | triosephosphate isomerase 1                              | -17.247 | Cytoplasm           |
| 362 | TPP2     | tripeptidyl peptidase 2                                  | 5.303   | Cytoplasm           |
| 363 | TPPP2    | tubulin polymerization promoting protein family member 2 | ∞       | Nucleus             |
| 364 | TSPAN16  | tetraspanin 16                                           | -2.087  | Other               |
| 365 | TUBB3    | tubulin beta 3 class III                                 | -2.771  | Cytoplasm           |
| 366 | TUBB8    | tubulin beta 8 class VIII                                | -∞      | Cytoplasm           |
| 367 | TUFM     | Tu translation elongation factor, mitochondrial          | 16.531  | Cytoplasm           |
| 368 | TXNDC17  | thioredoxin domain containing 17                         | 15.261  | Cytoplasm           |
| 369 | UCHL1    | ubiquitin C-terminal hydrolase L1                        | 12.932  | Cytoplasm           |
| 370 | UCHL3    | ubiquitin C-terminal hydrolase L3                        | 2.544   | Cytoplasm           |
| 371 | UQCRB    | ubiquinol-cytochrome c reductase binding protein         | 2.04    | Cytoplasm           |
| 372 | VAMP3    | vesicle associated membrane protein 3                    | 2.155   | Plasma Membrane     |
| 373 | VCP      | valosin containing protein                               | 1.924   | Cytoplasm           |
| 374 | VPS13A   | vacuolar protein sorting 13 homolog A                    | 1.644   | Cytoplasm           |
| 375 | WBP2NL   | WBP2 N-terminal like                                     | -3.213  | Cytoplasm           |
| 376 | ZDHHC3   | zinc finger DHHC-type palmitoyltransferase 3             | -7.647  | Cytoplasm           |
| 377 | ZPBP     | zona pellucida binding protein                           | -1.567  | Nucleus             |

**Note:** These data were extracted from Agarwal, Panner Selvam et al., 2019 and subjected to bioinformatic analysis using ingenuity pathway analysis tool. Study subjects: idiopathic infertile men; antioxidant formulation: FH PRO for Men antioxidant capsules (1000 µg B12, 30 mg zinc, 140 µg selenium, 350 mg l-arginine, 2000 mg l-carnitine tartrate, 200 mg Co-Q10, 120 mg vitamin C, 200 IU vitamin E); dose and treatment duration: 3 capsules/day for a period of 6 months. ∞: Expressed in sperm only after antioxidant treatment; -∞: Absent in sperm after antioxidant treatment.
